# Supplementary material for: Involvement of Gastrin-Releasing Peptide Receptor in the Regulation of Adipocyte Differentiation in 3T3-L1 Cells
Source: MDPI journal article supplement (doi:10.3390/ijms19123971), 2018-12-10
Supplement: s1 [file s1]

## ► Supplemental Figure 1

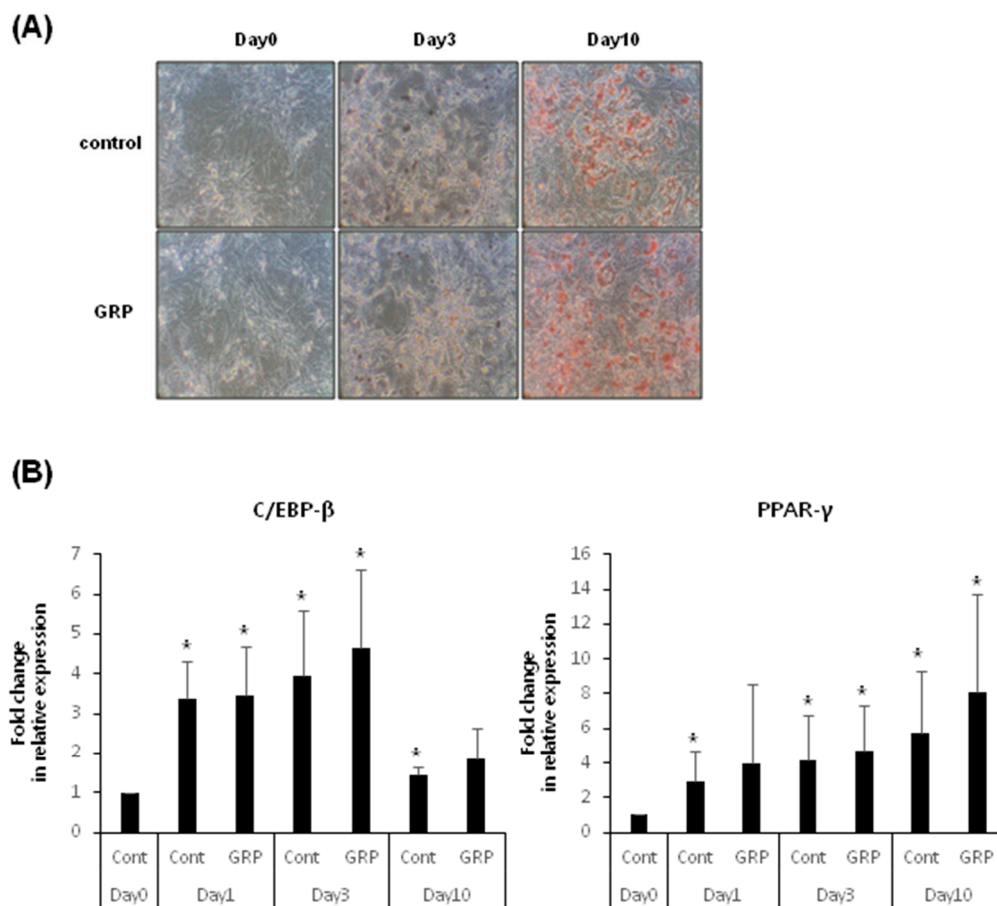

Supplemental figure 1. The effect of GRP on adipocyte differentiation of 3T3-L1 cells. (A) During differentiation, GRP (100 nM) was co-treated with DMI (DEX, IBMX, and insulin). Adipogenic cells were observed and stained with Oil Red O under a phase contrast microscope. (B) The effect of GRP on adipogenic differentiation markers was analyzed by Real-time PCR using primers specific to *C/EBP-β* or *PPAR-γ*. \*P < 0.05 compared to Day 0.
